# Supplementary material
Source: MDPI journal article supplement (https://www.mdpi.com/2226-471X/6/4/204)
Supplement: s1 [file s1]

Archive with 2 entries (2 files):
- Supplementary_material_1_Assess_guidelines_SUBMIT.pdf
- Supplementary_material_2_Assess_guidelines_SUBMIT.pdf
